# Supplementary material for: New bis[cis-{MoO2}] complexes with dihydrazone ligands: synthesis, characterization, theoretical investigation and their peroxidase mimicking activity
Source: Royal Society of Chemistry journal article supplement (doi:10.1039/d3dt00118k), 2023-01-01
Supplement: d3dt00118k1.pdf [file d3dt00118k1.pdf]

Journal: Dalton Transaction

Manuscript ID: DT-ART-01-2023-000118

## Electronic Supporting information

### New Bis[*cis*-{MoO<sub>2</sub>}] complexes with dihydrazone ligands: Synthesis, characterization, theoretical investigation and their peroxidase mimicking activity

Lata Rana <sup>a,\*</sup>, Dheeraj <sup>a</sup> and Geeta Hundal <sup>b</sup>

\* Corresponding author: L. Rana

E-mail: [latarana@chem.svnit.ac.in](mailto:latarana@chem.svnit.ac.in)

<sup>a</sup>Department of Chemistry, S. V. National Institute of Technology Surat, icchanath, Surat 395007

<sup>b</sup>Department of Chemistry, UGC Sponsored- Centre for Advanced Studies-II, Guru Nanak Dev University, Amritsar 143005, Punjab, India

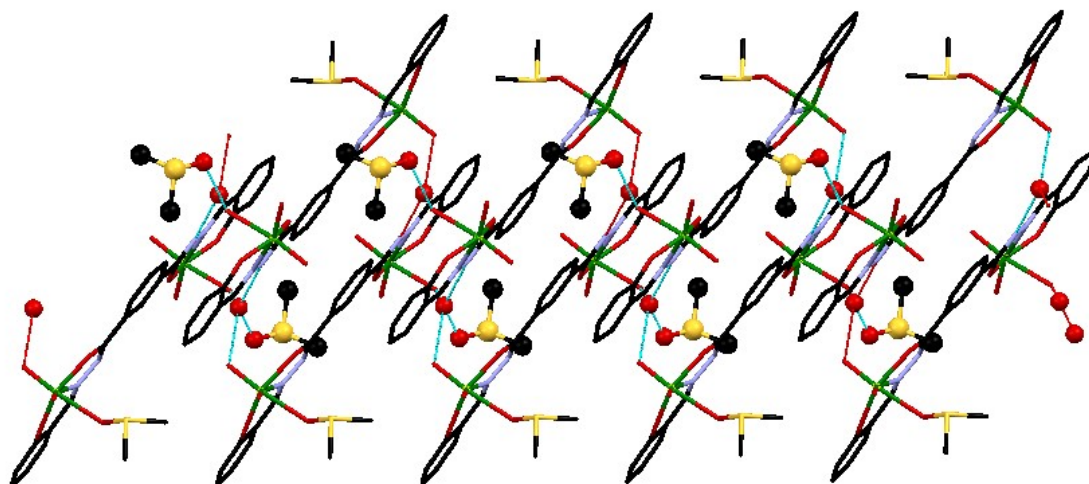

**Fig. S1** In complex **1a**, various H-bonding interactions forming parallel stacking of the centrosymmetric dimeric units in the *ac* plane. Solvent DMSO and water molecules have been shown as balls.

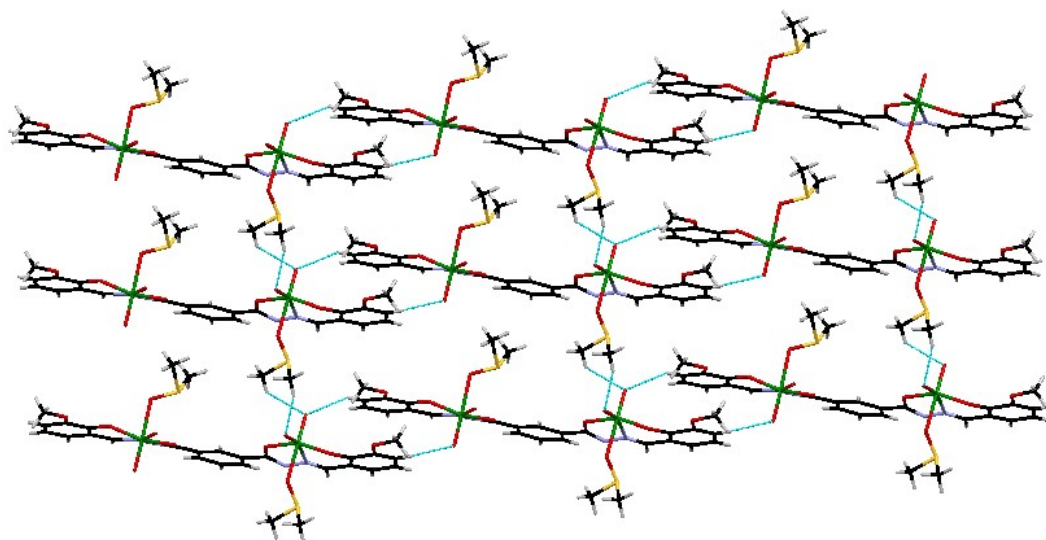

**Fig. S2** In complex **2a**, various weak C-H...O H-bonding interactions forming a 2D network in the *bc* plane.

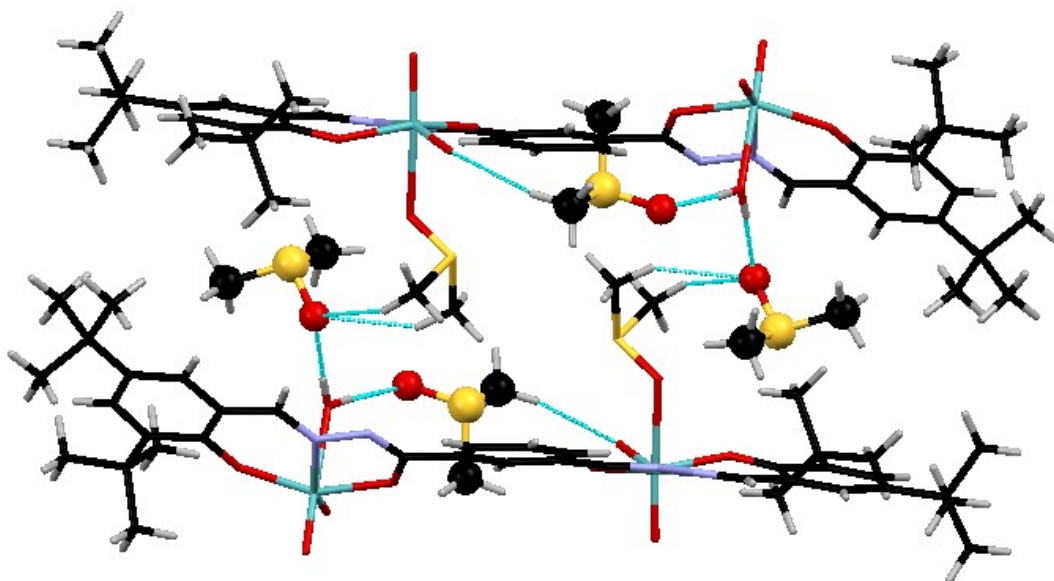

**Fig. S3** In complex **3a**, various H-bonding interactions forming a centrosymmetric dimer of the binuclear units. Lattice DMSO molecules have been shown as balls.

**Table S1** X-ray(experimental) and calculated (DFT/B3LYP method) selected bond lengths of complexes **1a–3a**

| Bond length<br>[Å] | 1a       |       | 2a       |       | 3a       |       |
|--------------------|----------|-------|----------|-------|----------|-------|
|                    | Obs.     | Calc. | Obs.     | Calc. | Obs.     | Calc. |
| N(2)-Mo(1)         | 2.221(4) | 2.92  | 2.254(7) | 2.923 | 2.225(3) | 1.970 |
| N(3)-N(4)          | 1.393(5) | 1.393 | 1.401(9) | 1.398 | 1.400(4) | 1.398 |
| N(4)-Mo(2)         | 2.241(4) | 2.923 | 2.239(6) | 2.927 | 2.230(3) | 1.960 |
| O(1)-Mo(1)         | 2.011(3) | 1.970 | 2.032(5) | 1.967 | 2.005(2) | 1.960 |
| O(2)-Mo(1)         | 1.910(3) | 1.907 | 1.906(5) | 1.989 | 1.919(3) | 1.956 |
| O(4)-Mo(1)         | 1.701(3) | 1.713 | 1.704(5) | 1.712 | 1.709(3) | 1.713 |
| O(5)-Mo(1)         | 2.293(4) | 1.976 | 1.705(6) | 1.712 | 2.340(3) | 1.970 |
| O(7)-Mo(2)         | 1.922(3) | 1.907 | 2.031(5) | 1.975 | 1.925(2) | 1.934 |

**Table S2** X-ray(experimental) and calculated (DFT/B3LYP method) selected bond angles of complexes **1a–3a**

| Bond Angle [°]  | 1a         |       | 2a         |       | 3a         |       |
|-----------------|------------|-------|------------|-------|------------|-------|
|                 | Obs.       | Calc. | Obs.       | Calc. | Obs.       | Calc. |
| O(3)-Mo(1)-O(4) | 105.1(2)   | 105.4 | 104.1(2)   | 105.4 | 105.11(16) | 105.8 |
| O(3)-Mo(1)-O(2) | 99.17(18)  | 97.8  | 99.17(18)  | 97.8  | 98.38(15)  | 97.9  |
| O(4)-Mo(1)-O(2) | 104.52(16) | 104.6 | 104.52(16) | 104.6 | 102.77(13) | 97.0  |
| O(3)-Mo(1)-O(1) | 95.14(16)  | 94.6  | 95.14(16)  | 94.6  | 97.11(13)  | 97.8  |
| O(4)-Mo(1)-O(1) | 95.99(15)  | 95.4  | 95.99(15)  | 95.4  | 97.60(13)  | 97.4  |
| O(2)-Mo(1)-O(1) | 150.86(15) | 155.4 | 150.86(15) | 155.4 | 150.12(12) | 151.6 |
| O(3)-Mo(1)-N(2) | 92.35(16)  | 94.4  | 92.35(16)  | 94.4  | 95.92(14)  | 95.8  |
| O(4)-Mo(1)-N(2) | 159.87(18) | 155.7 | 159.87(18) | 155.7 | 157.83(14) | 161.4 |
| O(2)-Mo(1)-N(2) | 82.07(14)  | 80.5  | 82.07(14)  | 80.5  | 80.62(11)  | 80.9  |
| O(1)-Mo(1)-N(2) | 72.06(13)  | 77.5  | 82.07(14)  | 80.5  | 80.62(11)  | 80.9  |
| O(3)-Mo(1)-O(5) | 168.27(16) | 171.3 | 168.27(16) | 171.3 | 169.96(14) | 169   |
| O(4)-Mo(1)-O(5) | 86.08(18)  | 87.5  | 86.08(18)  | 87.5  | 84.46(13)  | 88.9  |
| O(2)-Mo(1)-O(5) | 81.11(16)  | 80.7  | 81.11(16)  | 80.7  | 82.13(12)  | 79.8  |
| O(1)-Mo(1)-O(5) | 79.86(14)  | 74.5  | 79.86(14)  | 74.5  | 78.31(11)  | 79.6  |
| N(2)-Mo(1)-O(5) | 76.05(15)  | 77.6  | 76.05(15)  | 77.6  | 74.22(11)  | 74.7  |
| O(8)-Mo(2)-O(7) | 102.71(17) | 97.4  | 102.71(17) | 97.4  | 98.69(14)  | 97.9  |
| O(8)-Mo(2)-O(6) | 97.42(16)  | 97.6  | 97.42(16)  | 97.6  | 94.44(13)  | 95.5  |
| O(7)-Mo(2)-O(6) | 150.08(15) | 151.5 | 150.08(15) | 151.5 | 150.70(11) | 151.5 |
| O(8)-Mo(2)-N(4) | 159.34(19) | 155.3 | 159.34(19) | 155.3 | 94.03(13)  | 95.4  |
| O(7)-Mo(2)-N(4) | 82.72(14)  | 80.3  | 82.72(14)  | 80.3  | 80.93(11)  | 80.5  |
| O(6)-Mo(2)-N(4) | 71.07(13)  | 74.3  | 71.07(13)  | 74.3  | 72.09(10)  | 74.8  |

**Table S3** The Mulliken atomic charges of all the ligands calculated by B3LYP/6-31G(d,p) method.

| Atoms | I        | II       | III      | Atoms | I        | II       | III      |
|-------|----------|----------|----------|-------|----------|----------|----------|
| C1    | -3.03247 | -8.11089 | -6.3714  | C25   | 3.49672  | 6.7115   | 4.44141  |
| C2    | -1.91228 | -8.45356 | -5.61044 | C26   | -0.82998 | 6.38285  | 4.95835  |
| C3    | -1.43186 | -7.4495  | -4.0752  | C27   | -3.3648  | 9.03572  | 4.27413  |
| C4    | -2.1174  | -6.21641 | -3.48545 | O28   | -1.36769 | 8.50594  | 4.85133  |
| C5    | -3.39681 | -5.82534 | -4.35043 | N29   | -1.77565 | -6.33929 | 4.1384   |
| C6    | -3.83468 | -6.71287 | -5.70112 | N30   | -4.73398 | -7.13601 | 4.71804  |
| O7    | -4.15593 | -4.51485 | -3.72826 | C31   | -3.93207 | -8.80276 | 5.94036  |
| C8    | -0.15822 | -5.20561 | -1.95042 | C32   | 0.97107  | -9.42299 | 6.74995  |
| N9    | -5.22619 | -4.10994 | -1.3895  | C33   | 1.97209  | -7.7272  | 6.24027  |
| N10   | 0.18514  | -3.94917 | -2.17974 | C34   | 3.81344  | -4.53456 | 6.99234  |
| C11   | -3.57762 | -1.58853 | 0.09233  | C35   | 5.89537  | -5.41274 | 8.13878  |
| C12   | 0.64077  | -3.07569 | -1.4453  | C36   | 6.75045  | -4.85702 | 8.44783  |
| O13   | 1.73022  | -3.54289 | -2.07383 | C37   | 5.54768  | -1.70594 | 8.16208  |
| C14   | 2.33644  | -1.08665 | -6.2813  | O38   | -1.95933 | 0.77169  | 9.60065  |
| C15   | 3.57018  | 0.37489  | -7.66006 | C39   | -1.45598 | 2.16581  | 3.90907  |
| C16   | 4.17937  | 1.15905  | -6.45667 | C40   | -3.67083 | -1.04127 | 3.03144  |
| C17   | 5.41853  | 0.59913  | -5.39821 | C41   | -5.74358 | 2.905    | 3.80954  |
| C18   | 5.89425  | -0.67303 | -6.56548 | C42   | -5.4599  | 3.4453   | 5.28587  |
| C19   | 5.1884   | 1.47841  | -7.37827 | C43   | 3.94531  | 5.12373  | -7.43796 |
| C20   | 4.11507  | 1.09343  | -5.329   | C44   | -0.17132 | 7.55992  | -3.47431 |
| C21   | -3.91457 | 2.76523  | -7.62125 | C45   | 3.49672  | 6.7115   | 4.44141  |
| C22   | -2.96451 | 3.85557  | 0.77154  | C46   | -0.82998 | 6.38285  | 4.95835  |
| C23   | -3.20195 | 4.17199  | 2.3092   | H47   | -3.3648  | 9.03572  | 4.27413  |
| C24   | -2.12595 | 5.60621  | 2.983    | H48   | -1.36769 | 8.50594  | 4.85133  |

**Table S4** The Mulliken atomic charges of all complexes calculated by B3LYP/LANL2DZ method.

| Atoms | Complex 1 | Complex 2 | Complex 3 | ATOMS | Complex 1 | Complex 2 | Complex 3 |
|-------|-----------|-----------|-----------|-------|-----------|-----------|-----------|
| Mo1   | -0.51854  | -0.51854  | -0.60965  | C29   | 0.72113   | 1.92618   | 0.84412   |
| O2    | -1.26828  | -1.26828  | -1.45616  | N30   | 1.92618   | 0.80657   | 1.14597   |
| O3    | -1.91807  | -1.91807  | -1.93166  | Mo31  | 0.80657   | 1.08111   | 3.3404    |
| O4    | -1.32533  | -1.32533  | -1.47486  | O32   | 1.08111   | 3.31059   | 2.97101   |
| O5    | 0.20391   | 0.20391   | 0.15925   | O33   | 3.31059   | 2.7619    | 1.64771   |
| N6    | 0.54099   | 0.54099   | 0.58505   | O34   | 2.7619    | 1.61886   | 3.32899   |
| O7    | 1.72789   | 1.72789   | 1.4437    | O35   | 1.61886   | 3.22925   | 5.18893   |
| H8    | 2.54817   | 2.54817   | 2.30854   | N36   | 3.22925   | 5.11425   | 3.78551   |
| H9    | 1.75729   | 1.75729   | 1.41344   | O37   | 5.11425   | 3.83572   | 3.34189   |
| C10   | -1.04133  | -1.04133  | -1.05117  | H38   | 3.83572   | 3.56689   | 3.60769   |
| C11   | -0.56376  | -0.56376  | -0.43879  | H39   | 3.56689   | 3.92824   | 2.46023   |
| C12   | 0.26698   | 0.26698   | 0.51529   | C40   | 3.92824   | 2.70242   | 2.95342   |
| C13   | 0.65062   | 0.65062   | 0.88351   | N41   | 2.70242   | 2.88857   | 3.26368   |
| C14   | 0.20376   | 0.20376   | 0.30747   | C42   | 2.88857   | 3.27302   | 5.3319    |
| C15   | -0.69695  | -0.69695  | -0.71638  | C43   | 3.27302   | 5.45114   | 5.83486   |
| H16   | -1.68297  | -0.83888  | -0.70394  | C44   | 5.45114   | 6.06674   | 5.61769   |
| H17   | -0.83888  | 0.61254   | 1.61772   | C45   | 6.06674   | 5.61726   | 6.58624   |
| C18   | 0.61254   | 1.29456   | 0.85834   | H46   | 5.61726   | 6.80026   | 5.64079   |
| C19   | 1.29456   | 0.75322   | 1.87723   | C47   | 6.80026   | 5.97439   | 6.36395   |
| C20   | 0.75322   | 1.79286   | 1.20849   | C48   | 5.97439   | 6.32944   | 6.84565   |
| C21   | 1.79286   | 1.11939   | 0.87506   | H49   | 6.32944   | 6.91443   | 7.41304   |
| C22   | 1.11939   | 0.74253   | 1.21684   | C50   | 6.91443   | 7.26841   | 4.4922    |
| C23   | 0.74253   | 1.02551   | 1.88967   | H51   | 7.26841   | 7.4512    | 4.49606   |

|     |         |         |         |     |         |          |          |
|-----|---------|---------|---------|-----|---------|----------|----------|
| C24 | 1.02551 | 1.708   | 2.21802 | H52 | 6.431   | 4.62326  | 1.51556  |
| H25 | 1.708   | 2.10454 | 2.1285  | C53 | 7.4512  | 4.69498  | -2.83789 |
| H26 | 2.10454 | 2.07516 | 0.36043 | H54 | 4.62326 | 1.35256  | -2.12915 |
| H27 | 2.07516 | 0.23848 | 0.96423 | H55 | 4.69498 | 6.46504  | -3.57366 |
| H28 | 0.23848 | 0.72113 | 2.15198 | H56 | 1.35256 | -1.89883 | -3.31556 |

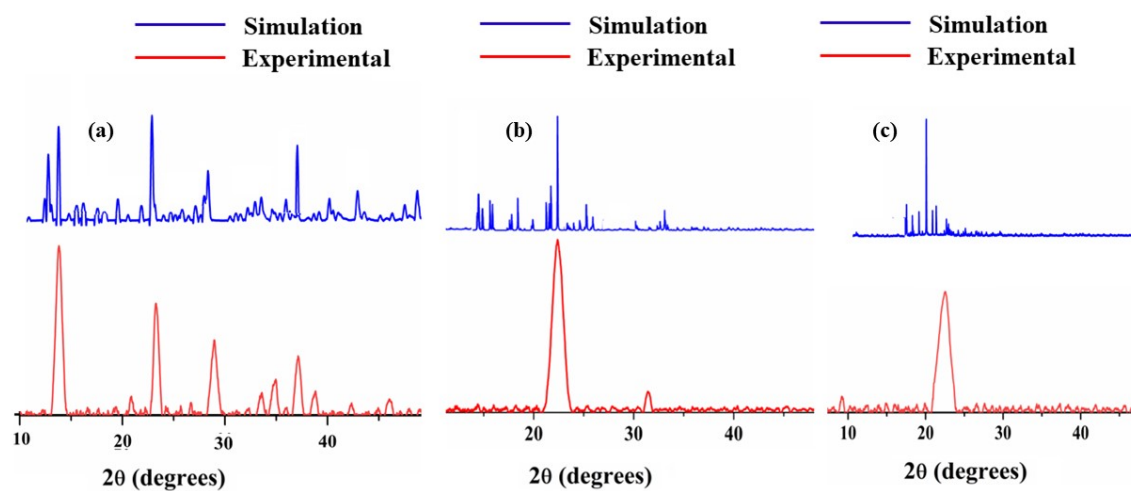

**Fig S4** Powder XRD patterns for (a) complex 1, (b) complex 2 and (c) complex 3.

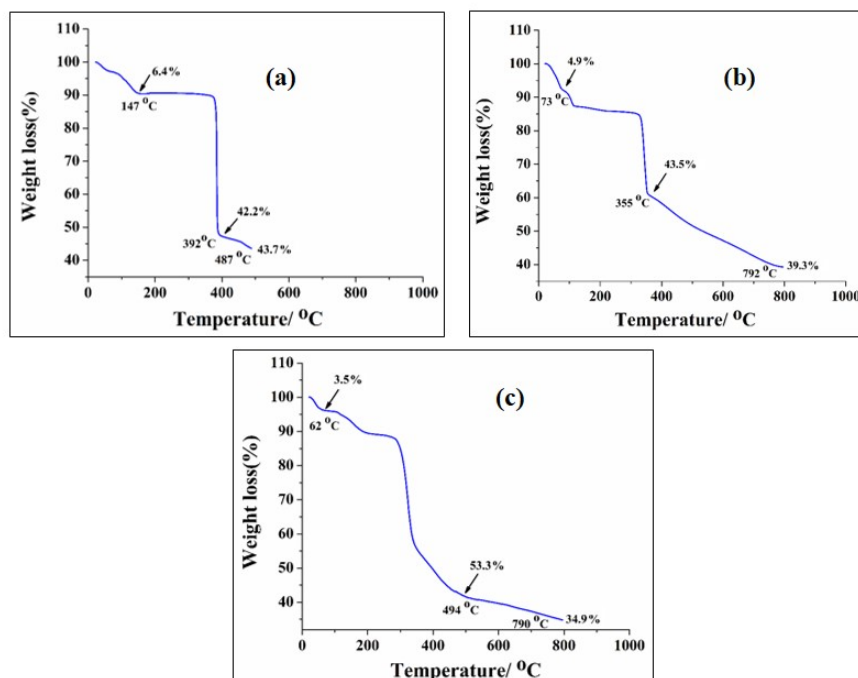

**Fig. S5** TGA profiles for (a) complex  $[\{\text{Mo}^{\text{VI}}\text{O}_2\}_2(\text{L}^1)(\text{H}_2\text{O})_2]$  **1**, (b) complex  $[\{\text{Mo}^{\text{VI}}\text{O}_2\}_2(\text{L}^2)(\text{H}_2\text{O})_2]$  **2**, and (c) complex  $[\{\text{Mo}^{\text{VI}}\text{O}_2\}_2(\text{L}^3)(\text{H}_2\text{O})_2]$  **3**.

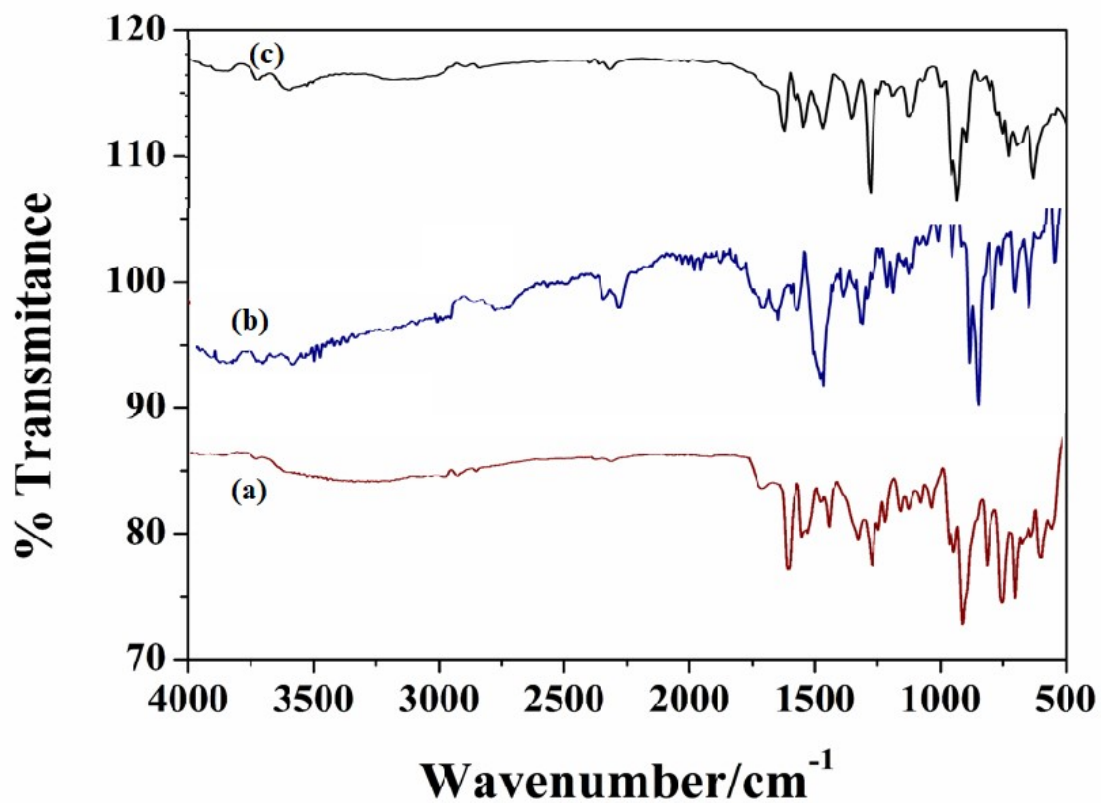

**Fig. S6** IR spectra of all binuclear molybdenum complexes for (a) complex 1, (b) complex 2, (c) complex 3 recorded experimentally.

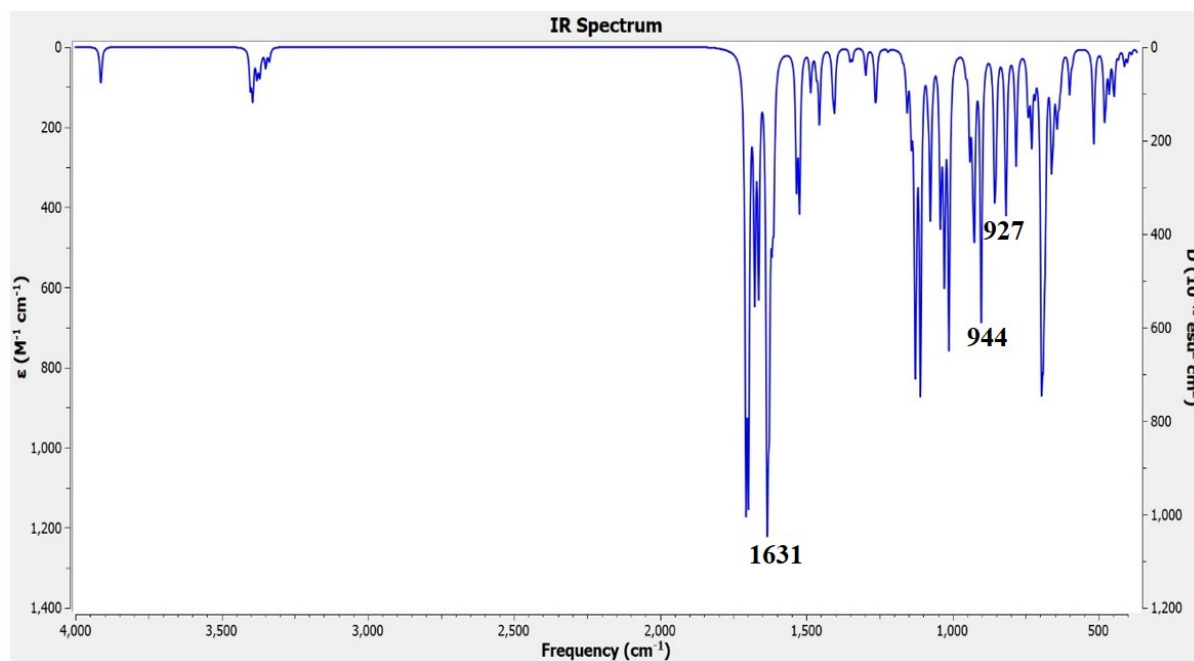

**Fig. S7** Theoretical IR spectra of complex 1.

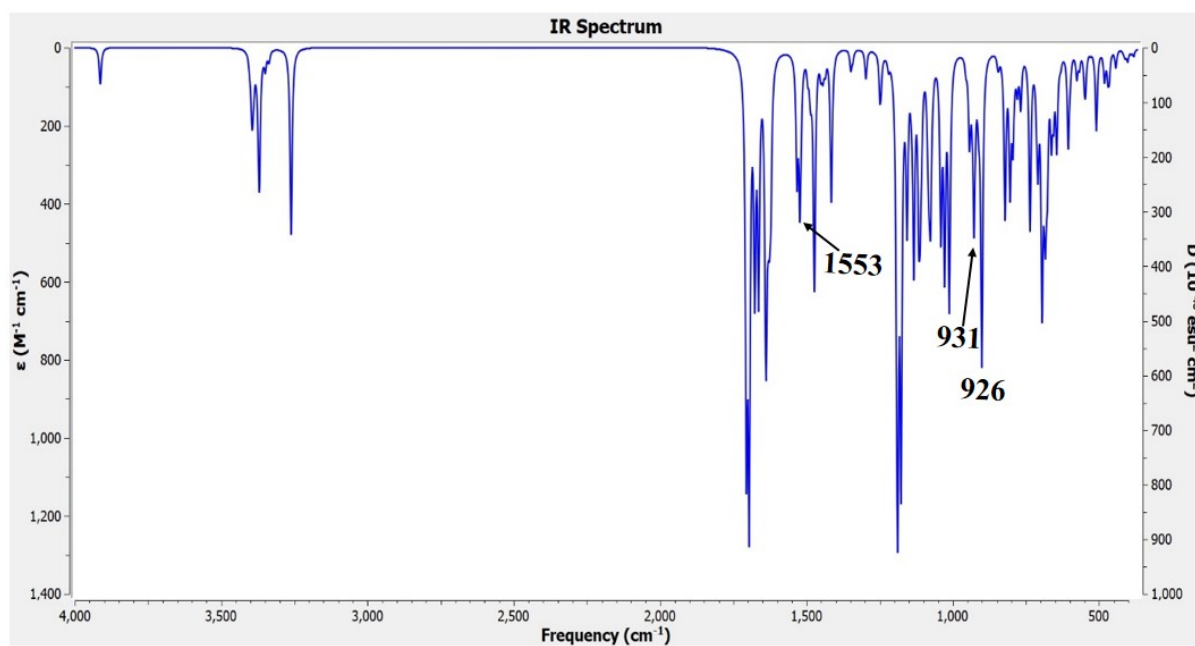

**Fig. S8** Theoretical IR spectra of complex 2.

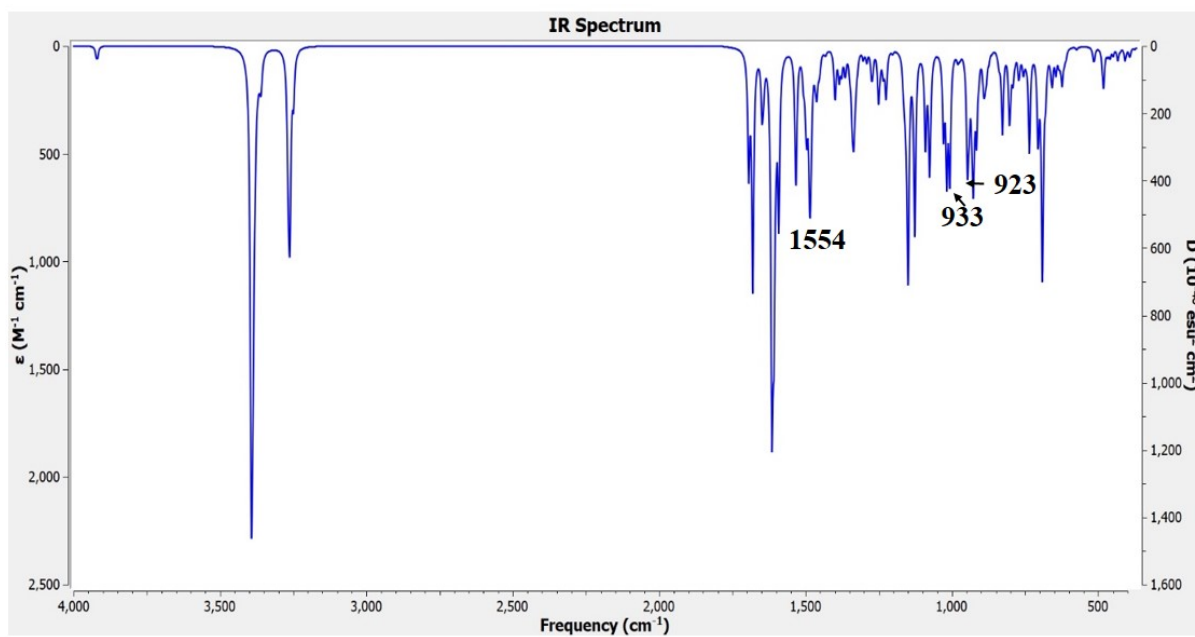

**Fig. S9** Theoretical IR spectra of complex 3.

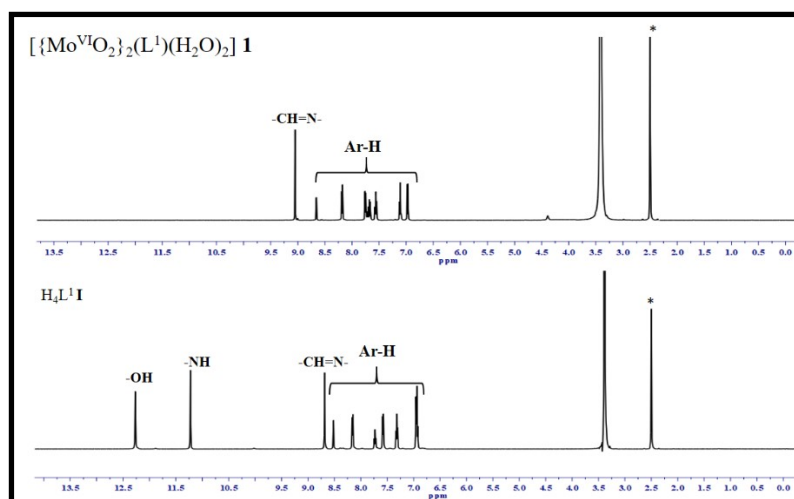

**Fig. S10**  $^1\text{H}$ -NMR spectra of ligand **I** and complex **1** were recorded in  $\text{DMSO-D}_6$ . \* represents the DMSO solvent peak.

**Table S5** The calculated and theoretical chemical shifts( $\delta$ ) values in ppm of the ligands and their complexes as determined by  $^1\text{H}$  NMR in  $\text{DMSO-d}_6$ .

| Compound  | values       | Phenolic<br>(-OH) | -NH              | -OCH <sub>3</sub> | tert-butyl | -CH=N-          | Aromatic protons                                                                                                        |
|-----------|--------------|-------------------|------------------|-------------------|------------|-----------------|-------------------------------------------------------------------------------------------------------------------------|
| <b>I</b>  | <b>Exp.</b>  | 12.27<br>(br, 2H) | 11.22<br>(s, 2H) | -                 | -          | 8.68<br>(s, 2H) | 8.52(s, 1H), 8.15–8.16(d, 2H), 7.71–7.74(t, 1H), 7.57–7.59(d, 2H), 7.30–7.33(t, 2H), 6.92–6.96(m, 4H)                   |
|           | <b>Calc.</b> | 10.00<br>(br, 2H) | 9.30<br>(s, 2H)  | -                 | -          | 8.70<br>(s, 2H) | 8.70(s, 1H), 8.10(d, 2H), 7.90(t, 1H), 7.50(d, 2H), 7.20(t, 2H), 6.90(m, 4H)                                            |
| <b>1</b>  | <b>Exp.</b>  | -                 | -                | -                 | -          | 9.05<br>(s, 2H) | 8.66(s, 1H), 8.17–8.19(d, 2H), 7.74–7.76(t, 1H), 7.68–7.70(d, 2H), 7.54–7.58(t, 2H), 7.09–7.12(t, 2H), 6.97–6.98(d, 2H) |
|           | <b>Calc.</b> | -                 | -                | -                 | -          | 8.50<br>(s, 2H) | 8.56(s, 1H), 8.40(d, 2H), 7.70(t, 1H), 7.40(d, 2H), 7.30(t, 2H), 7.20(t, 2H), 6.90(d, 2H)                               |
| <b>II</b> | <b>Exp.</b>  | 12.27(br, 2H)     | 10.89(s, 2H)     | 3.81(s, 6H)       | -          | 8.69<br>(s, 2H) | 8.51(s, 1H), 8.14–8.16(d, 2H), 7.70–7.74(t, 1H), 7.17–7.19(d, 2H), 7.03–7.05(d, 2H) 6.85–6.89(t, 2H)                    |
|           | <b>Calc.</b> | 10.4<br>(br, 2H)  | 10.10<br>(s, 2H) | 3.70<br>(s, 6H)   | -          | 8.80<br>(s, 2H) | 8.80(s, 1H), 8.10(d, 2H), 7.70(t, 1H), 7.20(d, 2H), 7.10(d, 2H), 6.80(t, 2H)                                            |
| <b>2</b>  | <b>Exp.</b>  | -                 | -                | 3.81(s, 6H)       | -          | 9.02<br>(s, 2H) | 8.65 (s, 1H), 8.17–8.18(d, 2H), 7.66–7.69(t, 1H), 7.31–7.33(d, 2H), 7.25–7.27(d, 2H), 7.03–7.06(t, 2H)                  |
|           | <b>Calc.</b> | -                 | -                | 2.80<br>(s, 6H)   | -          | 8.50<br>(s, 2H) | 8.40 (s, 1H), 8.50(d, 2H), 7.70(t, 1H), 7.70(d, 2H), 7.50(d, 2H), 7.30(t, 2H)                                           |



|     |              |                   |                  |   |                                          |                 |                                                                                 |
|-----|--------------|-------------------|------------------|---|------------------------------------------|-----------------|---------------------------------------------------------------------------------|
| III | <b>Exp.</b>  | 12.39<br>(br, 2H) | 12.23(s,<br>2H)  | — | 1.42(s, 18<br>H),<br>1.29(s, 18<br>H)    | 8.61<br>(s, 2H) | 8.50(s, 1H), 8.16–8.17(d,<br>2H), 7.75–7.78(t, 1H),<br>7.33(s, 2H), 7.24(s, 2H) |
|     | <b>Calc.</b> | 10.25<br>(br, 2H) | 10.15<br>(s, 2H) | — | 1.08<br>(s, 18 H),<br>0.96<br>(s, 18 H)  | 8.45<br>(s, 2H) | 8.56(s, 1H), 8.10–8.20(d,<br>2H), 7.66–7.69(t, 1H),<br>7.22(s, 2H), 7.19(s, 2H) |
| 3   | <b>Exp.</b>  | —                 | —                | — | 1.37(s, 18H)<br>1.31 (s,<br>18H)         | 9.04<br>(s, 2H) | 8.64(s, 1H), 8.17–8.19(d,<br>2H), 7.66–7.69(t, 1H),<br>7.54(s, 2H), 7.53(s, 2H) |
|     | <b>Calc.</b> | —                 | —                | — | 0.80<br>(s, 18H)<br><br>0.90<br>(s, 18H) | 8.40<br>(s, 2H) | 8.40(s, 1H), 8.30(d, 2H),<br>7.80(t, 1H), 7.60(s, 2H),<br>7.40(s, 2H)           |

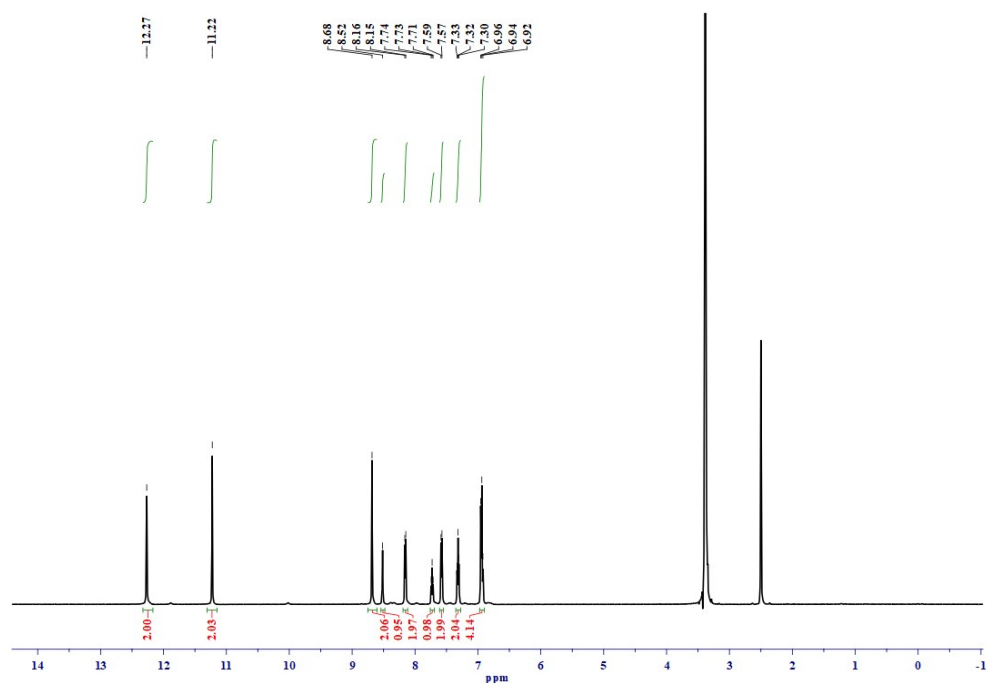

**Fig. S11**  $^1\text{H}$ -NMR spectra of Ligand I.

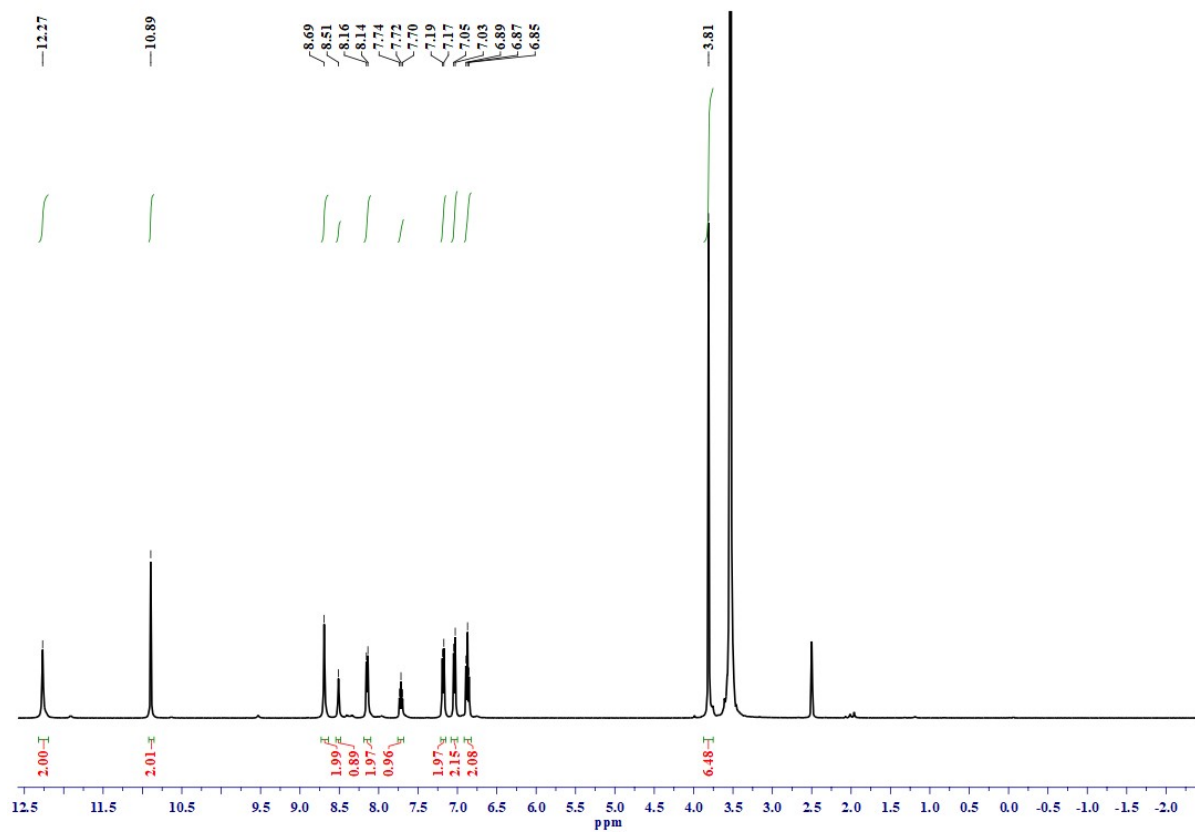

**Fig. S12**  $^1\text{H-NMR}$  spectra of Ligand II.

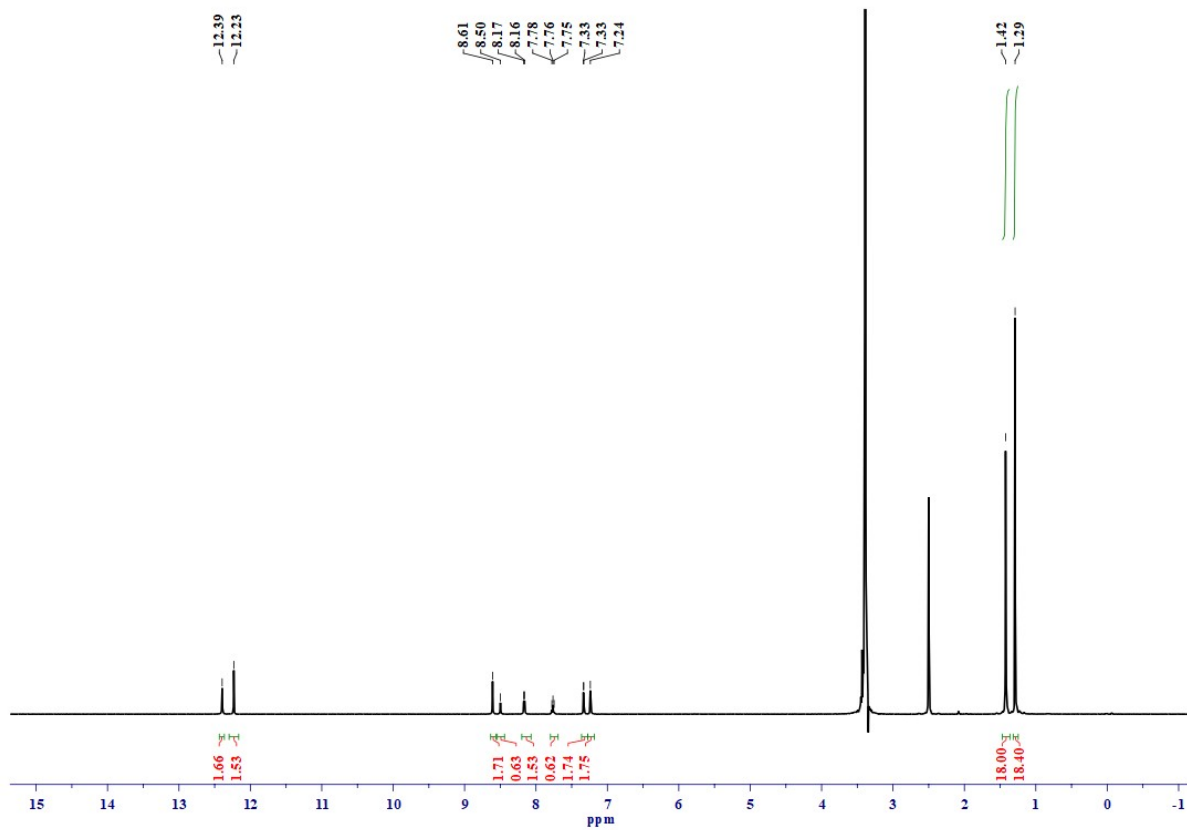

Fig. S13  $^1\text{H-NMR}$  spectra of Ligand III.

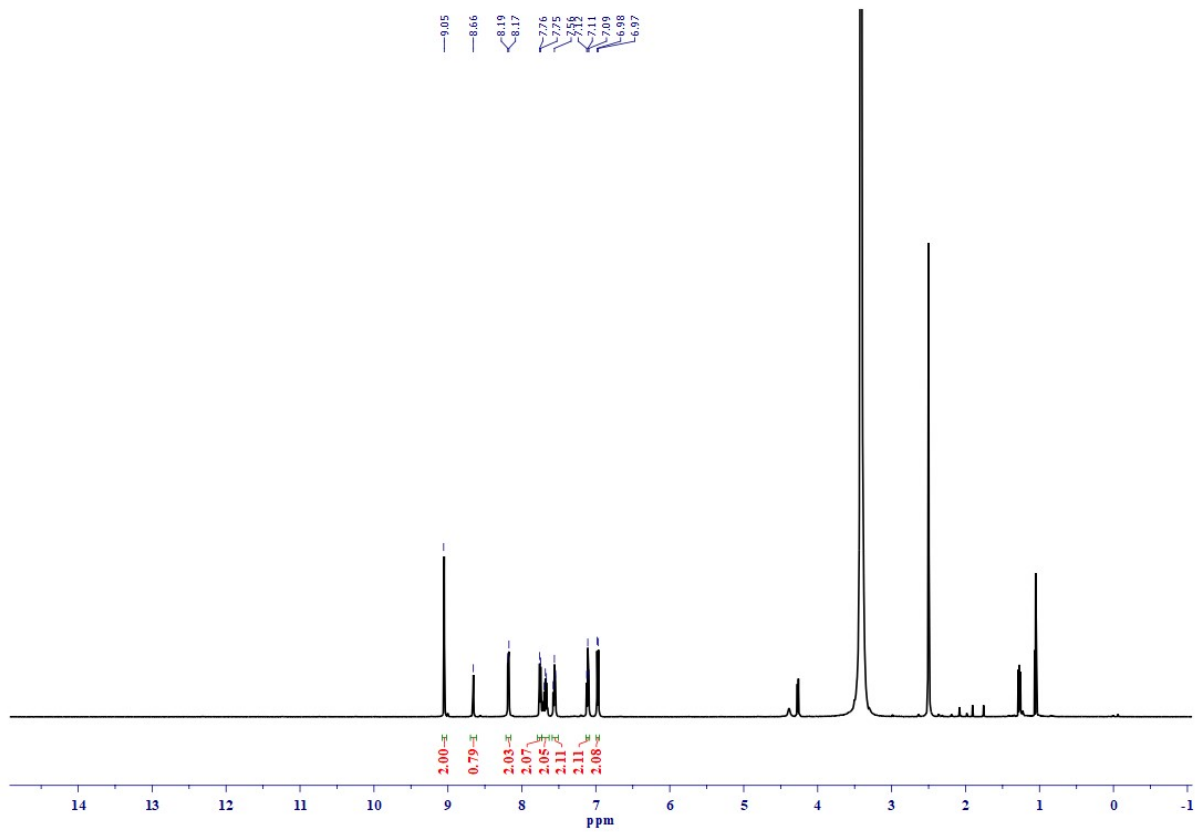

Fig. S14  $^1\text{H-NMR}$  spectra of complex 1.

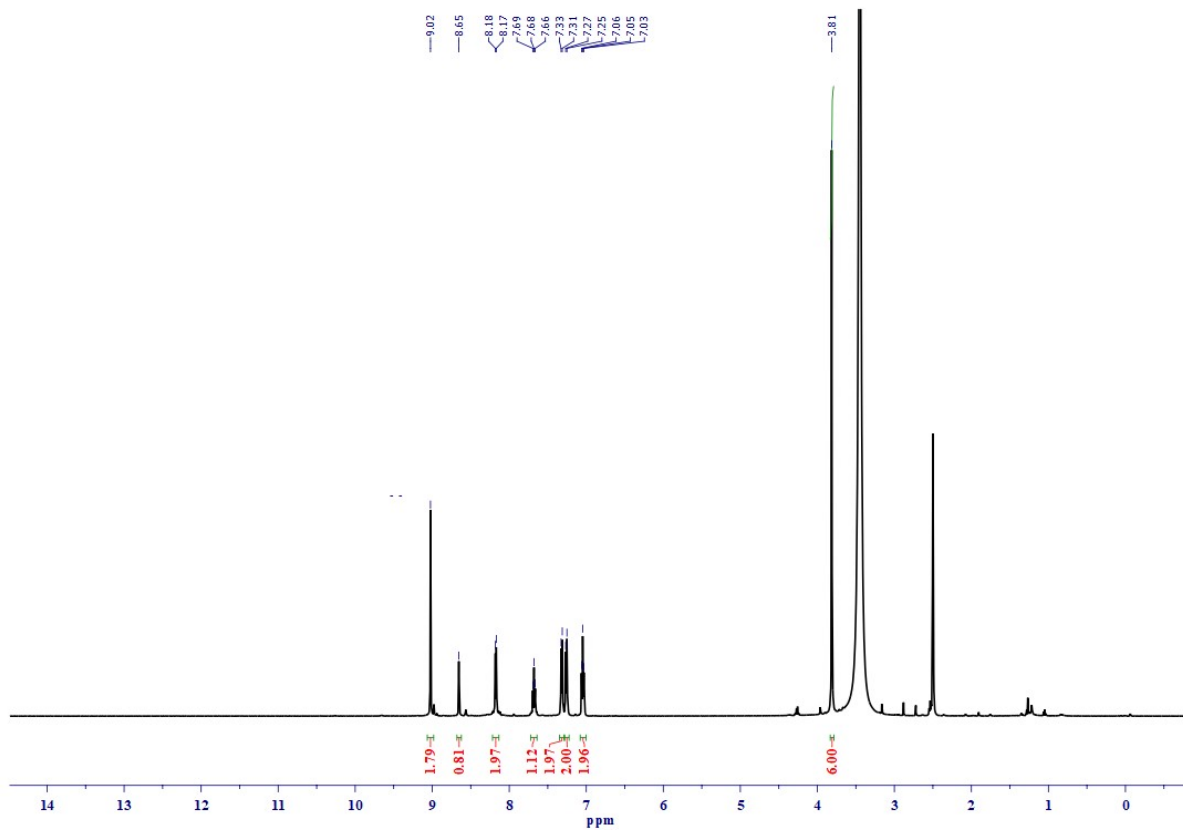

Fig. S15  $^1\text{H}$ -NMR spectra of Complex 2.

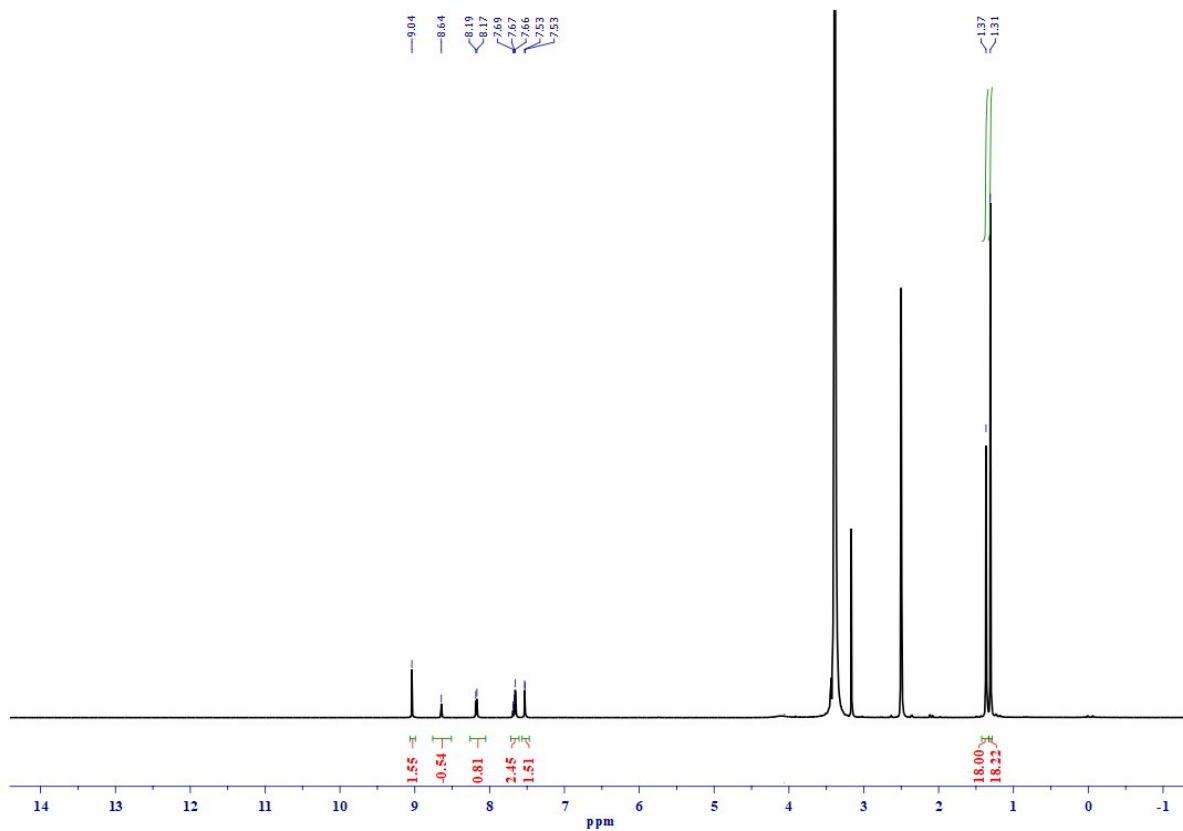

Fig. S16  $^1\text{H}$ -NMR spectra of Complex 3.

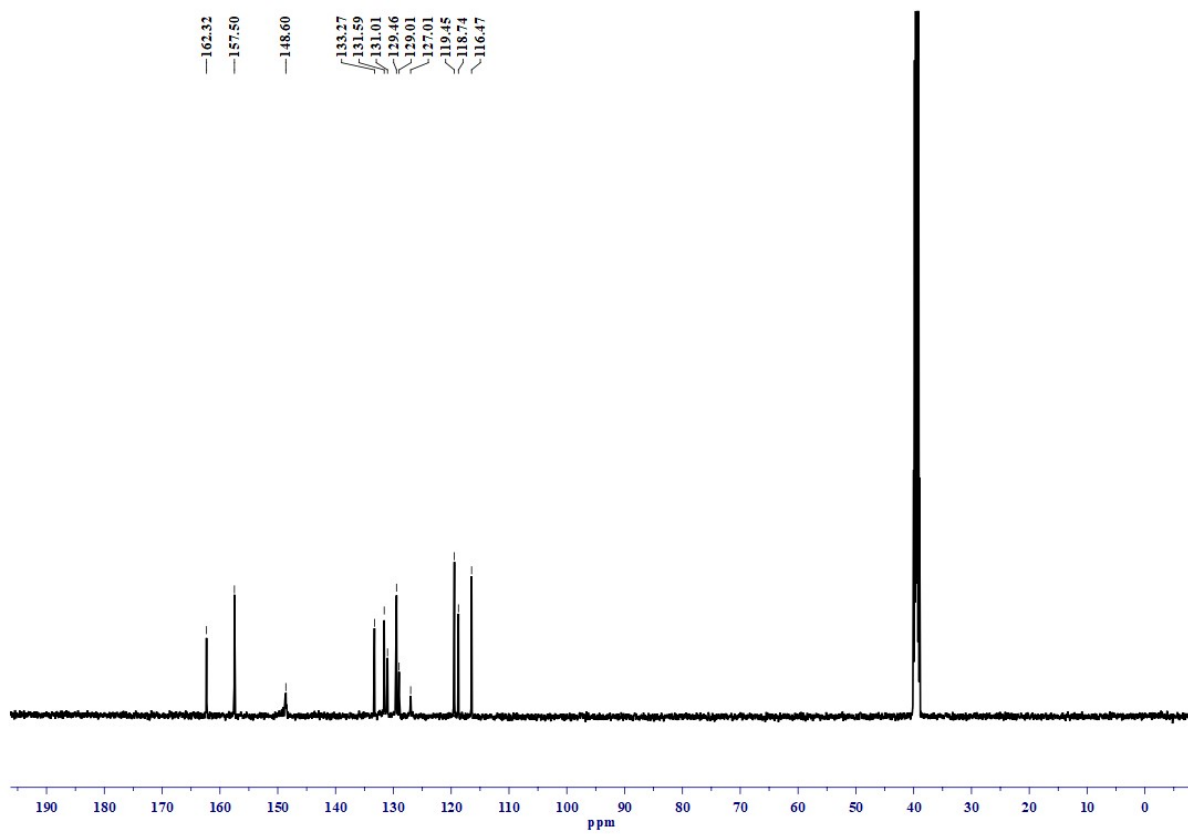

**Fig. S17**  $^{13}\text{C}$ -NMR spectra of Ligand I.

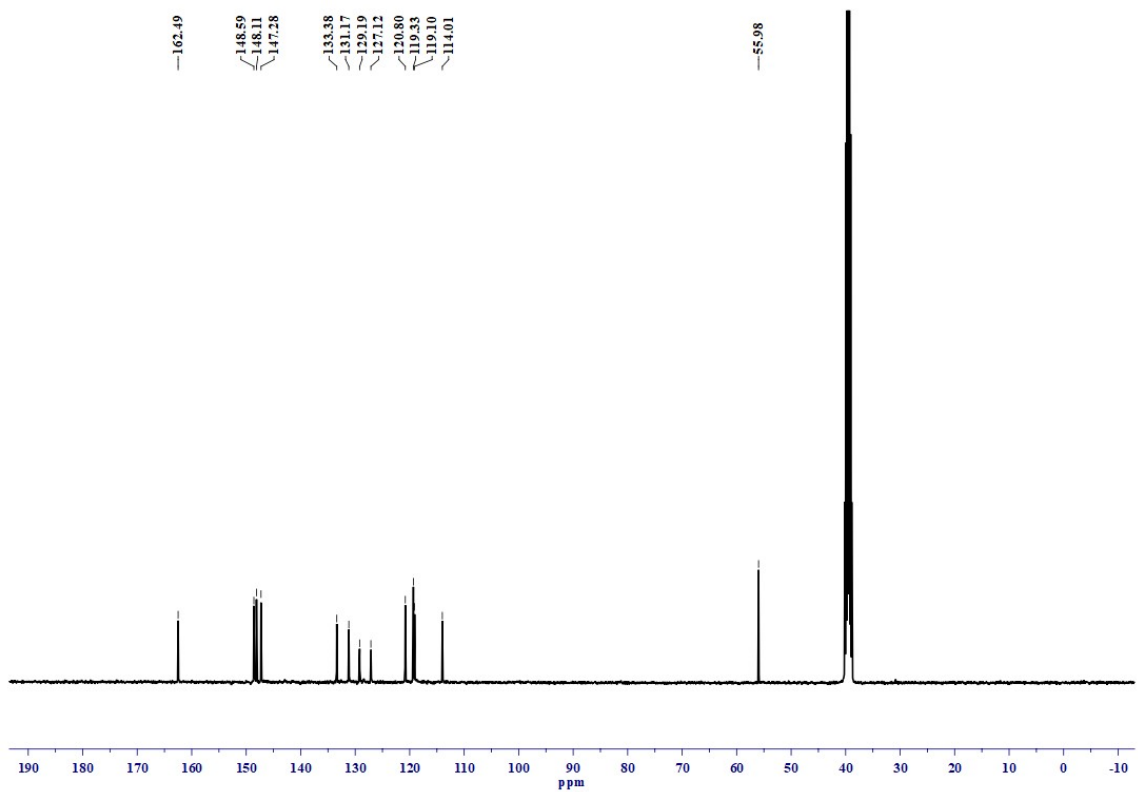

Fig. S18  $^{13}\text{C}$ -NMR spectra of Ligand II.

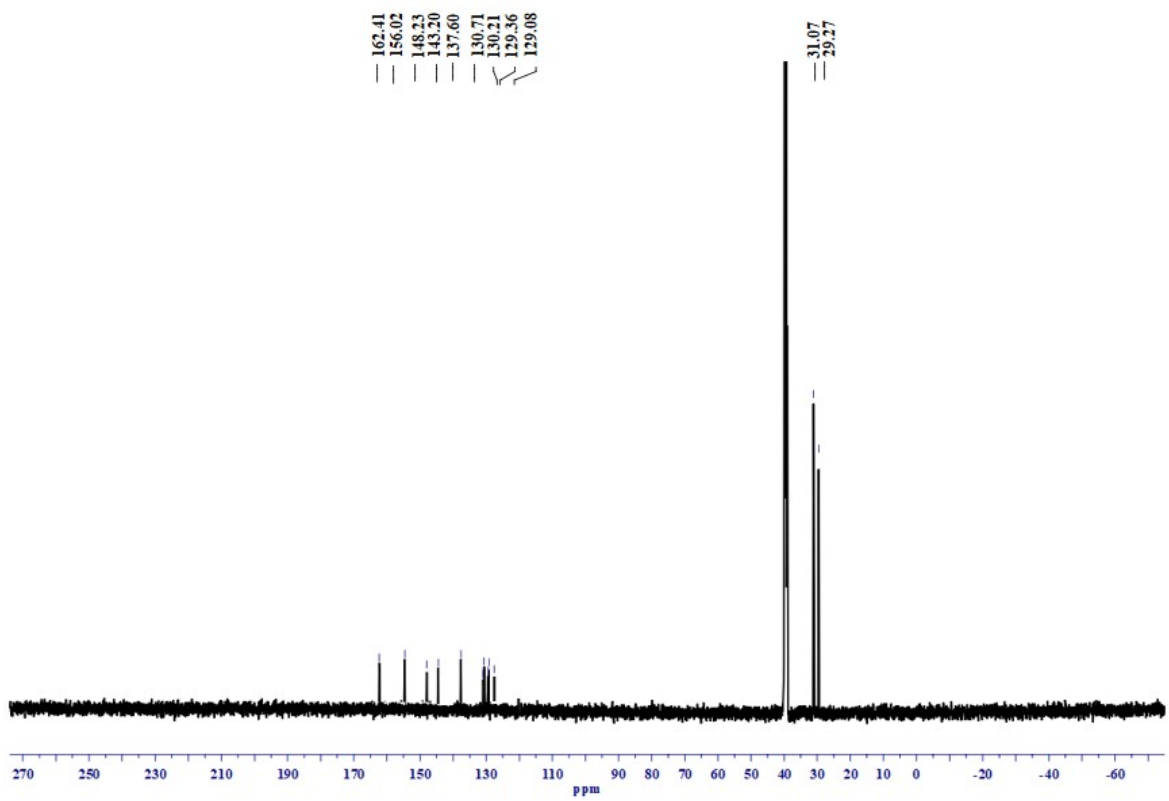

**Fig. S19**  $^{13}\text{C}$ -NMR spectra of Ligand **III**.

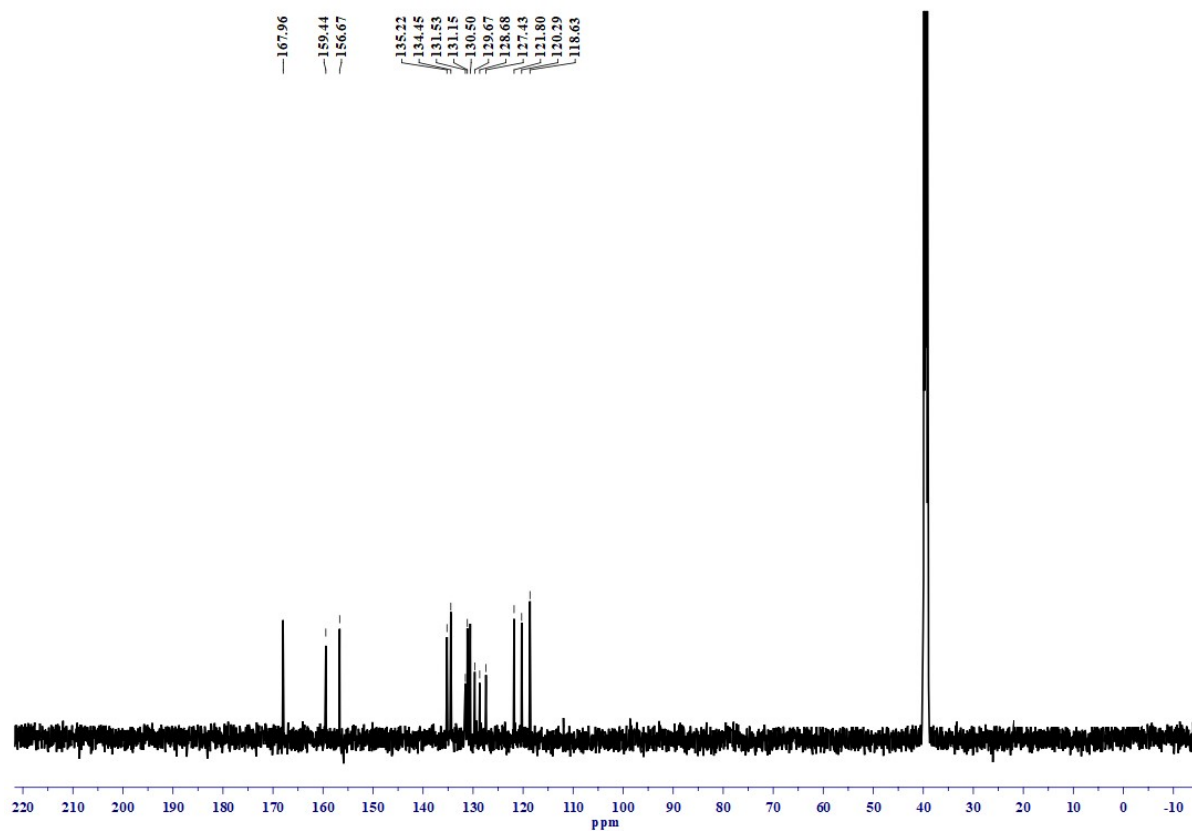

**Fig. S20**  $^{13}\text{C}$ -NMR spectra of complex **1**.

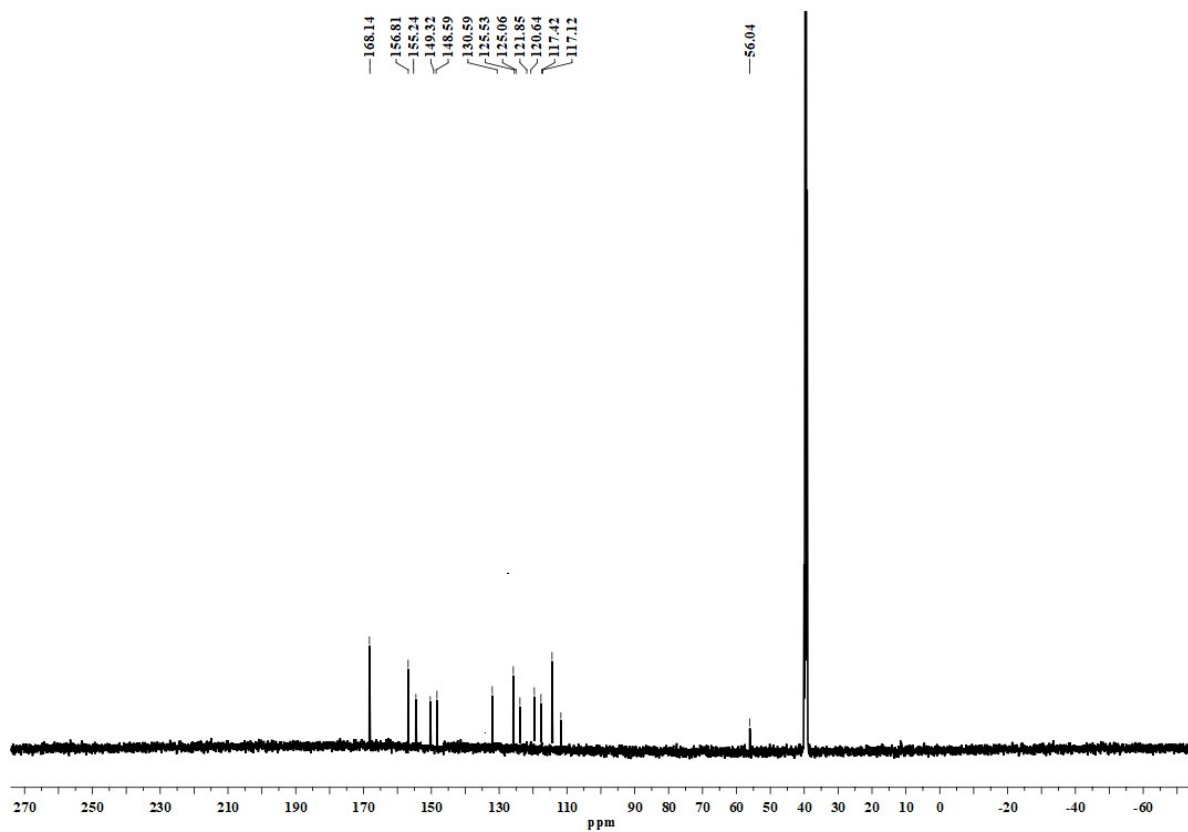

**Fig. S21**  $^{13}\text{C}$ -NMR spectra of complex 2.



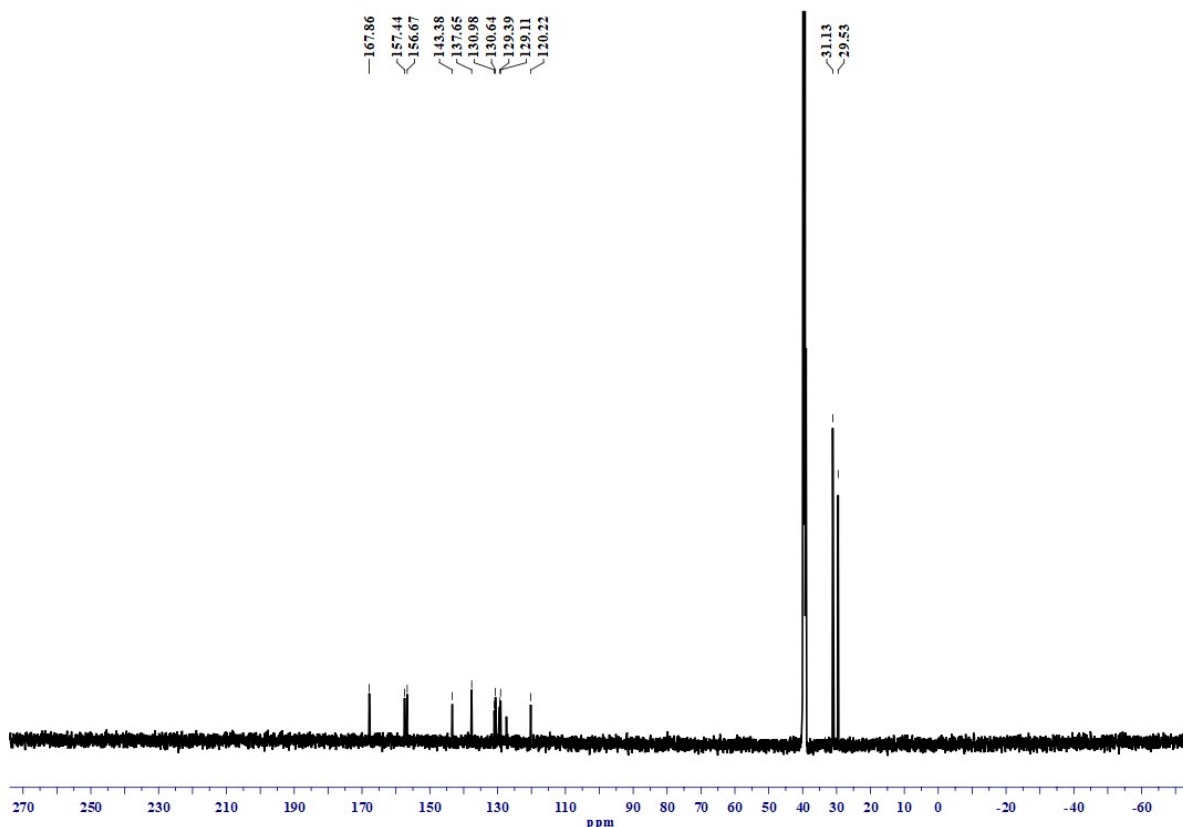

**Fig. S22**  $^{13}\text{C}$ -NMR spectra of complex 3.

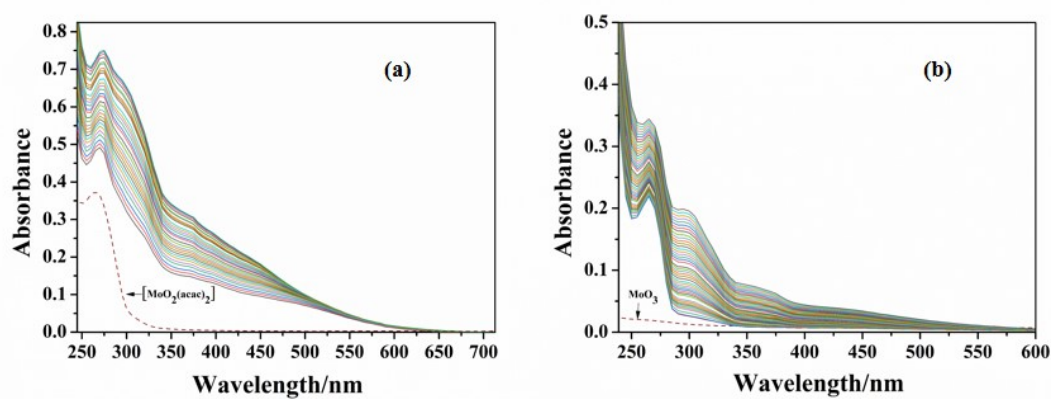

**Fig. S23** (a) The optimal reaction conditions for pyrogallol peroxidase activity were pyrogallol solution (1 mL,  $2.5 \times 10^{-2}$  M),  $[\text{MoO}_2(\text{acac})_2]$  (0.004 g), 30%  $\text{H}_2\text{O}_2$  (1 mL,  $2.5 \times 10^{-4}$  M), pH 7 phosphate buffer (1 mL, 1 M), and reaction temperature ( $25^\circ\text{C}$ ), with no visible band at  $\lambda_{\text{max}}=420$  nm; (b) pyrogallol solution (1 mL,  $2.5 \times 10^{-2}$  M),  $\text{MoO}_3$  (0.004 g), 30%  $\text{H}_2\text{O}_2$  (1 mL,  $2.5 \times 10^{-4}$  M), pH 7 phosphate buffer (1 mL, 1 M), and reaction temperature ( $25^\circ\text{C}$ ) were used, and no discernible band was found at  $\lambda_{\text{max}}=420$  nm.

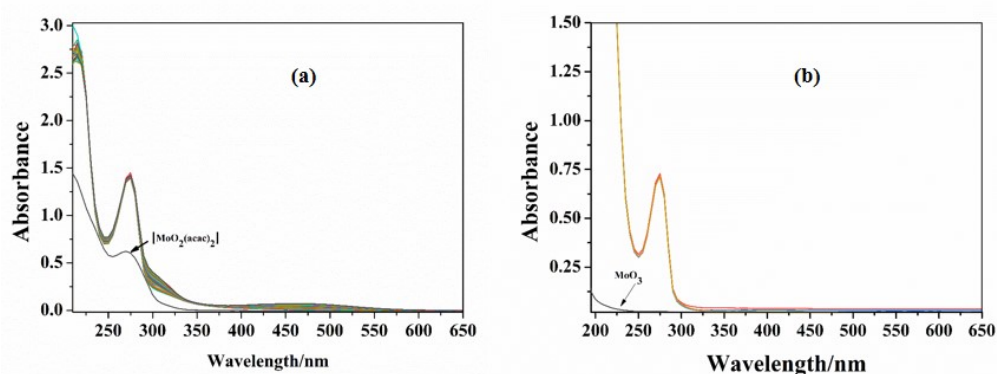

**Fig. S24** (a) The optimal reaction conditions for dopamine peroxidase activity were dopamine 1 mL,  $2 \times 10^{-3}$  M in MeOH,  $[\text{MoO}_2(\text{acac})_2]$  ( $2.0 \times 10^{-4}$  M), 30%  $\text{H}_2\text{O}_2$  (1 mL,  $2 \times 10^{-3}$  M), pH 7 phosphate buffer (1 mL, 1 M), and reaction temperature ( $25^\circ\text{C}$ ), with less intensity band evident at  $\lambda_{\text{max}} = 465$  nm in 8 h; (b) dopamine 1 mL,  $2 \times 10^{-3}$  M in MeOH,  $\text{MoO}_3$  ( $2.0 \times 10^{-4}$  M), 30%  $\text{H}_2\text{O}_2$  (1 mL,  $2 \times 10^{-3}$  M), pH 7 phosphate buffer (1 mL, 1 M), and reaction temperature ( $25^\circ\text{C}$ ) were used, and no discernible band was found at  $\lambda_{\text{max}} = 465$  nm.

**Reactivity of  $[\{\text{Mo}^{\text{VI}}\text{O}_2\}_2(\text{L}^3)(\text{H}_2\text{O})_2]$  **3** with  $\text{H}_2\text{O}_2$**

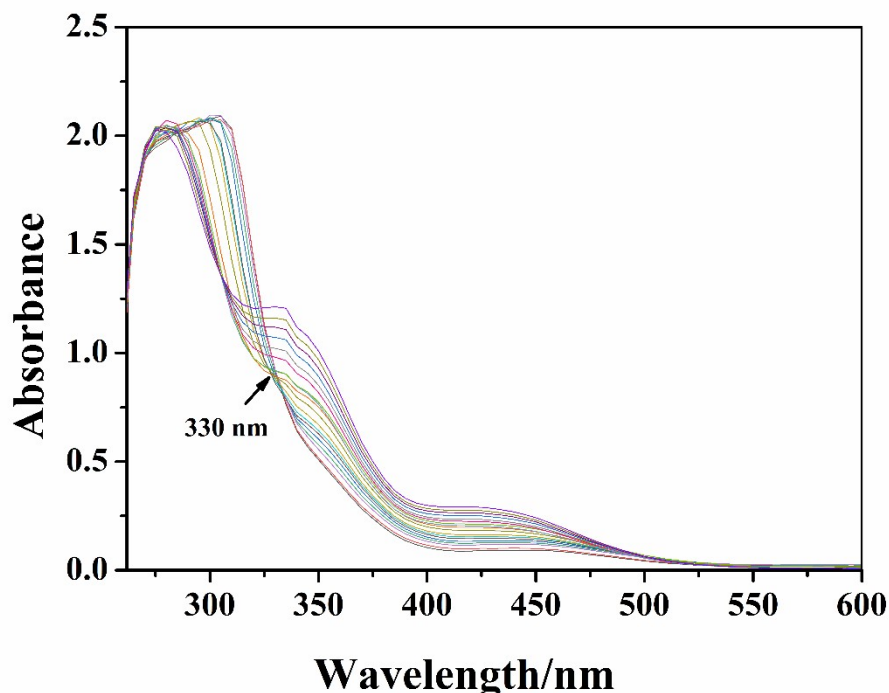

**Fig. S25** UV-Visible spectrum marked changes during the titration of [ $\{\text{Mo}^{\text{VI}}\text{O}_2\}_2(\text{L}^3)(\text{H}_2\text{O})_2$ ] **3** with  $\text{H}_2\text{O}_2$ . The spectra were obtained by gradually adding  $\text{H}_2\text{O}_2$  (1 drop of 30%  $\text{H}_2\text{O}_2$  in 5 mL DMSO) to  $2.2 \times 10^{-4}$  M solution of **3**.

During the catalytic reaction, in situ formation of oxidoperoxidomolybdenum(VI) intermediates can be observed and investigated using a UV-Visible spectrophotometer ( Fig. S25). <sup>1</sup> Titration of 10 mL of DMSO solution of dioxido complex [ $\{\text{Mo}^{\text{VI}}\text{O}_2\}_2(\text{L}^3)(\text{H}_2\text{O})_2$ ] **3** ( $2.2 \times 10^{-4}$  M) with 30 %  $\text{H}_2\text{O}_2$  (one drop, 0.0072 g, 0.21 mmol) diluted in 5 mL of DMSO results in the shifting of a 280 nm band at 305 nm with a little change in intensity. After 7 drops of this diluted solution, there was no change in the intensity of band 305 nm. However, the intensity of bands at 335 nm and 425 nm shifted to the lower intensity, and an isosbestic point was noticed at 330 nm, indicating the generation of oxidoperoxidomolybdenum(VI) species that transfer their oxygen to the substrate, causing the production of oxidised substrate product.

1, 2

## References

1. M. R. Maurya, N. Chaudhary, F. Avecilla and I. Correia, Mimicking peroxidase activity by a polymer-supported oxidovanadium (IV) Schiff base complex derived from salicylaldehyde and 1, 3-diamino-2-hydroxypropane, *J. Inorg. Biochem.*, 2015, **147**, 181–192.

2. M. R. Maurya, R. Tomar, L. Rana and F. Avecilla, Trinuclear Dioxidomolybdenum (VI) Complexes of Tritopic Phloroglucinol-Based Ligands and Their Catalytic Applications for the Selective Epoxidation of Olefins, *Eur. J. Inorg. Chem.*, 2018, **25**, 2952–2964.
